# Supplementary material for: Controlled growth of Sb2S3 nanorods on phosphorus doped reduced graphene oxide for enhanced overall water splitting
Source: Royal Society of Chemistry journal article supplement (doi:10.1039/d3nj01361h), 2023-01-01
Supplement: d3nj01361h1.pdf [file d3nj01361h1.pdf]

## Supporting Information

# Controlled growth of $\text{Sb}_2\text{S}_3$ nanorods on phosphorous doped reduced graphene oxide for enhanced overall water splitting

A. Gowrisankar, K. Selvadharshini, Krishnendu M. Nair, T. Selvaraju\*

Department of Chemistry, Bharathiar University-641046, Coimbatore, India

Email id: [veluselvaraju@gmail.com](mailto:veluselvaraju@gmail.com)

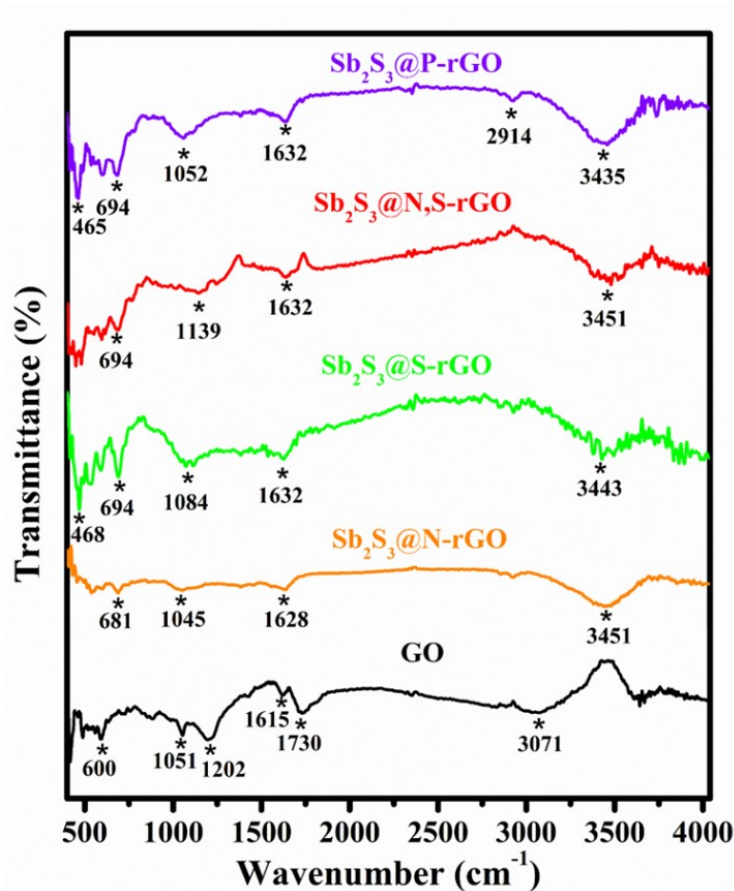

Fig. S1. FT-IR analysis of as-synthesized electrocatalysts.

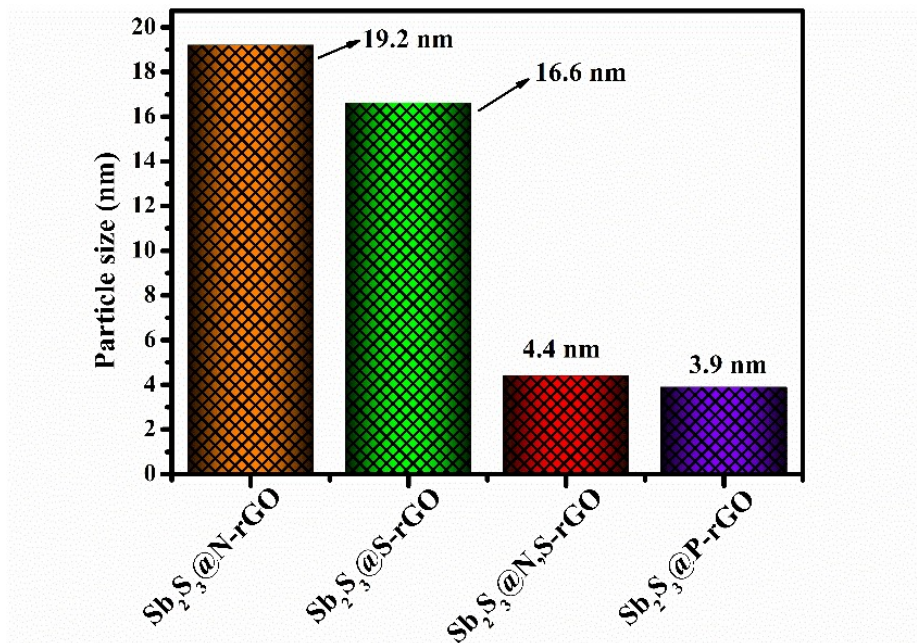

**Fig. S2.** Particle size distribution plot of as-synthesized electrocatalysts.

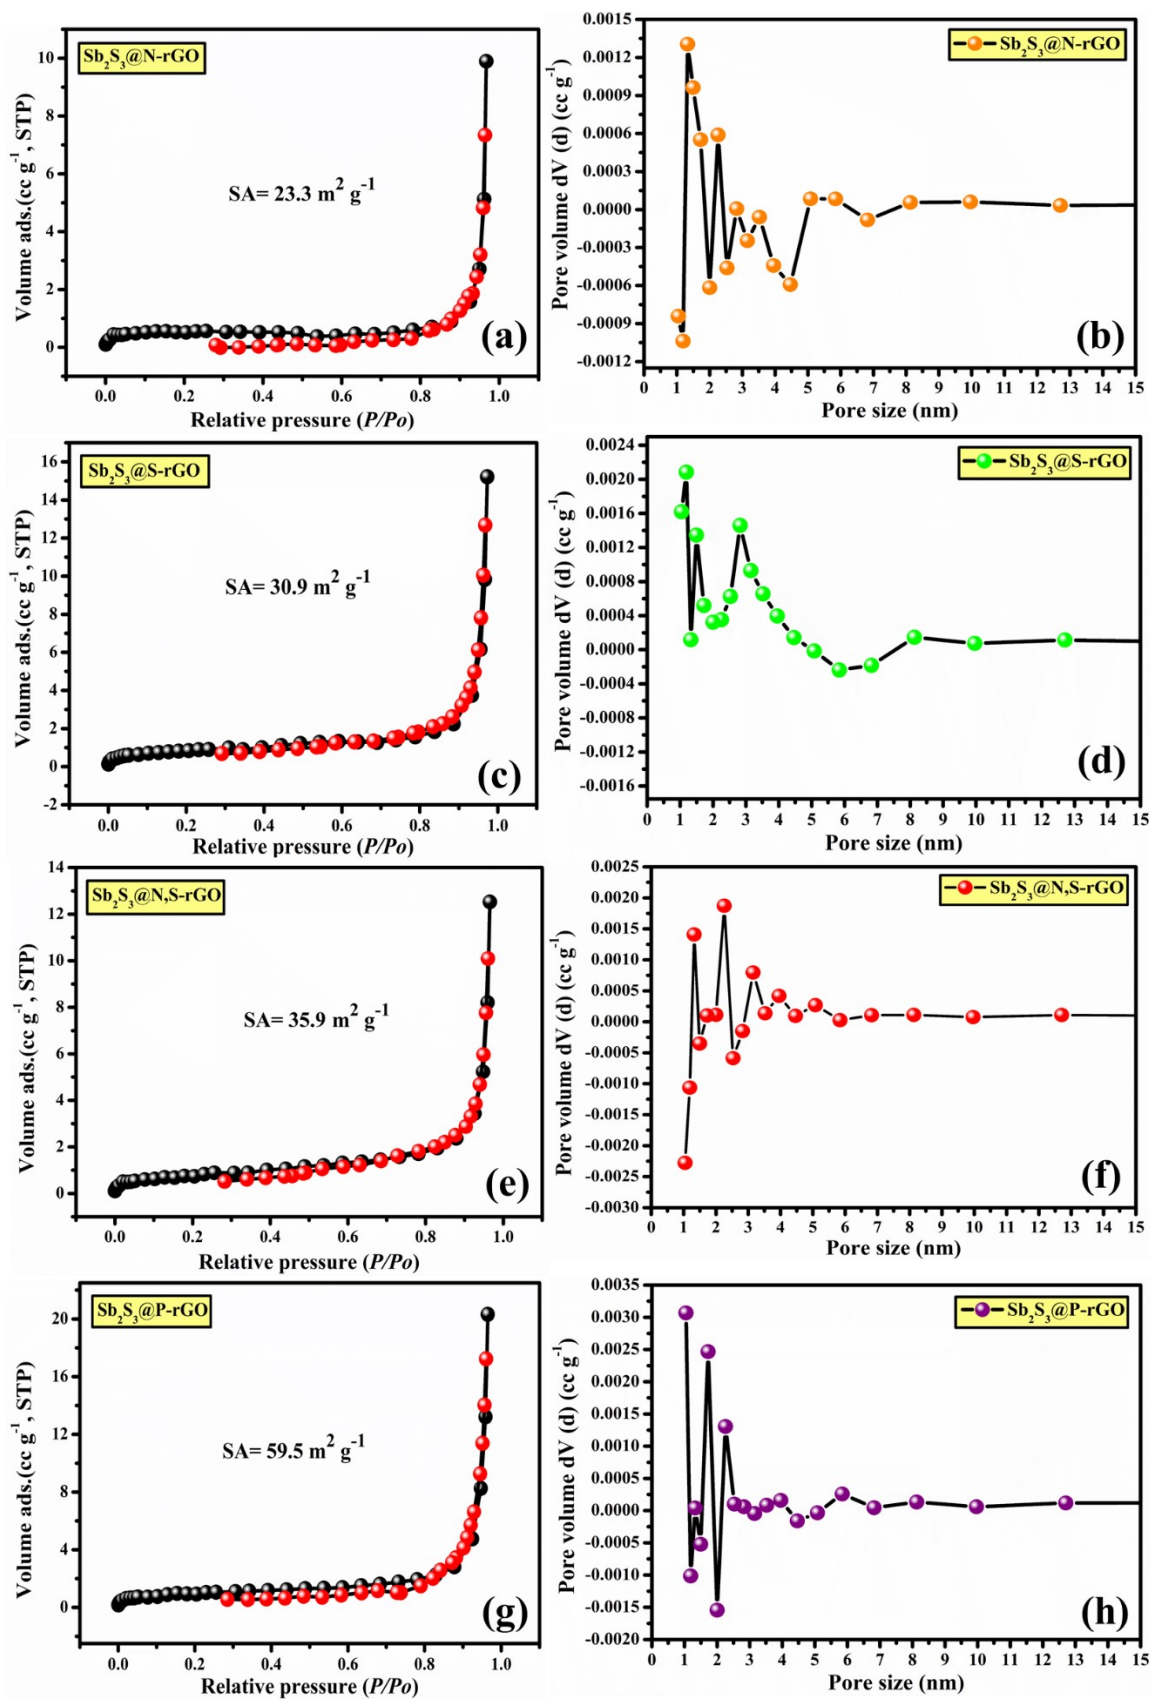

**Fig. S3.**  $N_2$  adsorption-desorption curves and pore size analysis of  $Sb_2S_3@N$ -rGO (a, b),  $Sb_2S_3@S$ -rGO (c, d),  $Sb_2S_3@N,S$ -rGO (e, f) and  $Sb_2S_3@P$ -rGO (g, h) electrocatalysts, respectively.

**Table S1.** Electrochemical activities of different heteroatom doped rGO supported  $\text{Sb}_2\text{S}_3$  composite materials at the GCE electrode for the HER and OER.

| Electrocatalyst | $\eta$ (mV) at<br>10 mA cm <sup>-2</sup> |            | $j$ (mA cm <sup>-2</sup> )<br>at 300 mV | Tafel Slope<br>(mV dec <sup>-1</sup> ) |              | EIS plot<br>( $\Omega$ ) |                 | TOF<br>(ms <sup>-1</sup> ) |              |
|-----------------|------------------------------------------|------------|-----------------------------------------|----------------------------------------|--------------|--------------------------|-----------------|----------------------------|--------------|
|                 | HER                                      | OER        | OER                                     | HER                                    | OER          | R <sub>s</sub>           | R <sub>ct</sub> | HER                        | OER          |
| SSNG            | 238.6                                    | 310.7      | 10.16                                   | 128.4                                  | 200.5        | 9.97                     | -               | 714.3                      | 254.3        |
| SSSG            | 206.5                                    | 290.8      | 12.45                                   | 125.3                                  | 192.3        | 18.87                    | -               | 521.5                      | 327.8        |
| SSNSG           | 195.6                                    | 272.2      | 15.49                                   | 88.7                                   | 181.5        | 19.23                    | -               | 252.1                      | 155.9        |
| SSPG            | <b>186.6</b>                             | <b>160</b> | <b>56.63</b>                            | <b>88.1</b>                            | <b>141.8</b> | <b>6.43</b>              | -               | <b>922.2</b>               | <b>955.6</b> |

**Table S2.** Comparative electrocatalytic performances of as prepared electrocatalysts with similar state-of-the-art materials.

| S. No.    | Electrocatalyst                                                                      | Electrolyte    | OER, $\eta$ (mV)<br>@ 10 mA cm <sup>-2</sup> | HER, $\eta$ (mV) @<br>10 mA cm <sup>-2</sup> | Cell voltage<br>(V)               |
|-----------|--------------------------------------------------------------------------------------|----------------|----------------------------------------------|----------------------------------------------|-----------------------------------|
| 1         | NCS/NS-rGO                                                                           | 1 M KOH        | 253.4                                        | 92.7                                         | 1.58                              |
| 2         | PrGO/NiCoP                                                                           | 1 M KOH        | 281.3                                        | 106                                          | 1.56                              |
| 3         | SNG@GF                                                                               | 1 M KOH        | 330                                          | 247                                          | 1.75                              |
| 4         | Ni <sub>2</sub> P@NSG                                                                | 1 M KOH        | 240                                          | 110                                          | 1.572                             |
| 5         | CoP/GO-400                                                                           | 1 M KOH        | 340                                          | 105                                          | 1.70                              |
| 6         | Al, Fe-codoped<br>CoP/RGO                                                            | 1 M KOH        | 280                                          | 145                                          | 1.66                              |
| 7         | NiVB/rGO                                                                             | 1 M KOH        | 267                                          | 151                                          | 1.56                              |
| 8         | Ir/N-rGO                                                                             | 1 M KOH        | 260                                          | 76                                           | 1.74                              |
| 9         | rGO/Co <sub>2</sub> P-800                                                            | 1 M KOH        | 378                                          | 134                                          | 1.78                              |
| 10        | Co-SCN/RGO                                                                           | 1 M KOH        | 250                                          | 150                                          | 1.63                              |
| 11        | FeS <sub>2</sub> -MoS <sub>2</sub> @CoS <sub>2</sub> -<br>MOF                        | 1 M KOH        | 211 at<br>20 mA cm <sup>-2</sup>             | 92                                           | 1.51                              |
| 12        | G-Mo-Ni <sub>3</sub> S <sub>2</sub>                                                  | 1 M KOH        | 326 at<br>20 mA cm <sup>-2</sup>             | 68                                           | 1.58                              |
| 13        | S-(Co, Fe)OOH                                                                        | 1 M KOH        | 240                                          | 186                                          | 1.64                              |
| 14        | S, N-Co <sub>9</sub> S <sub>8</sub>                                                  | 1 M KOH        | 244                                          | 92                                           | 1.54                              |
| 15        | Co <sub>3</sub> S <sub>4</sub> @MoS <sub>2</sub> -<br>Ni <sub>3</sub> S <sub>2</sub> | 1 M KOH        | 270 at<br>50 mA cm <sup>-2</sup>             | 136                                          | 1.72 at<br>50 mA cm <sup>-2</sup> |
| <b>16</b> | <b>Sb<sub>2</sub>S<sub>3</sub>@P-rGO</b>                                             | <b>3 M KOH</b> | <b>160</b>                                   | <b>186.6</b>                                 | <b>1.57</b>                       |

#### Abbreviations:

(NCS/NS-rGO) - NiCo<sub>2</sub>S<sub>4</sub>/N, S co-doped reduced graphene oxide,<sup>1</sup> (PrGO/NiCoP) - Ni-Co phosphides encapsulated in P-doped reduced graphene oxide,<sup>2</sup> (SNG@GF) - Nitrogen and sulfur co-doped graphene on graphite foam,<sup>3</sup> (Ni<sub>2</sub>P@NSG) - Ni<sub>2</sub>P nanocrystals encapsulated in N- and S-doped graphene,<sup>4</sup> (CoP/rGO-400) - CoP/reduced graphene oxide at 400 °C,<sup>5</sup> (Al, Fe-codoped CoP/RGO) - Al, Fe- codoped CoP nanoparticles/reduced graphene oxide,<sup>6</sup> (NiVB/rGO) - Nickel/vanadium boride nanoparticles/reduced graphene oxide,<sup>7</sup> (Ir/N-rGO) -

N-doped graphene anchored Ir nanoparticles,<sup>8</sup> (**rGO/Co<sub>2</sub>P**) - Cobalt phosphide loaded reduced graphene oxide,<sup>9</sup> (**Co-SCN/RGO**) - Cobalt-coordinated sulfur-doped graphitic carbon nitride and reduced graphene oxide,<sup>10</sup> (**FeS<sub>2</sub>-MoS<sub>2</sub>@CoS<sub>2</sub>-MOF**) - Metal-organic framework (MOF)-derived mesoporous CoS<sub>2</sub> nanoarrays coupled with FeS<sub>2</sub>@MoS<sub>2</sub> layers,<sup>11</sup> (**G-Mo-Ni<sub>3</sub>S<sub>2</sub>**) - Graphene-Quantum-Dots (GQDs) loaded and molybdenum doped porous Ni<sub>3</sub>S<sub>2</sub> hybrid,<sup>12</sup> (**S-(Co,Fe)OOH**) - Sulfur-incorporated cobalt-iron (oxy) hydroxide nanosheets,<sup>13</sup> (**S, N-C<sub>6</sub>S<sub>8</sub>**) - Sulfur-enriched N-C<sub>6</sub>S<sub>8</sub>,<sup>14</sup> (**Co<sub>3</sub>S<sub>4</sub>@MoS<sub>2</sub>-Ni<sub>3</sub>S<sub>2</sub>**) - Zeolitic imidazolate framework derived Co<sub>3</sub>S<sub>4</sub> hybridized MoS<sub>2</sub>-Ni<sub>3</sub>S<sub>2</sub> heterointerface.<sup>15</sup>

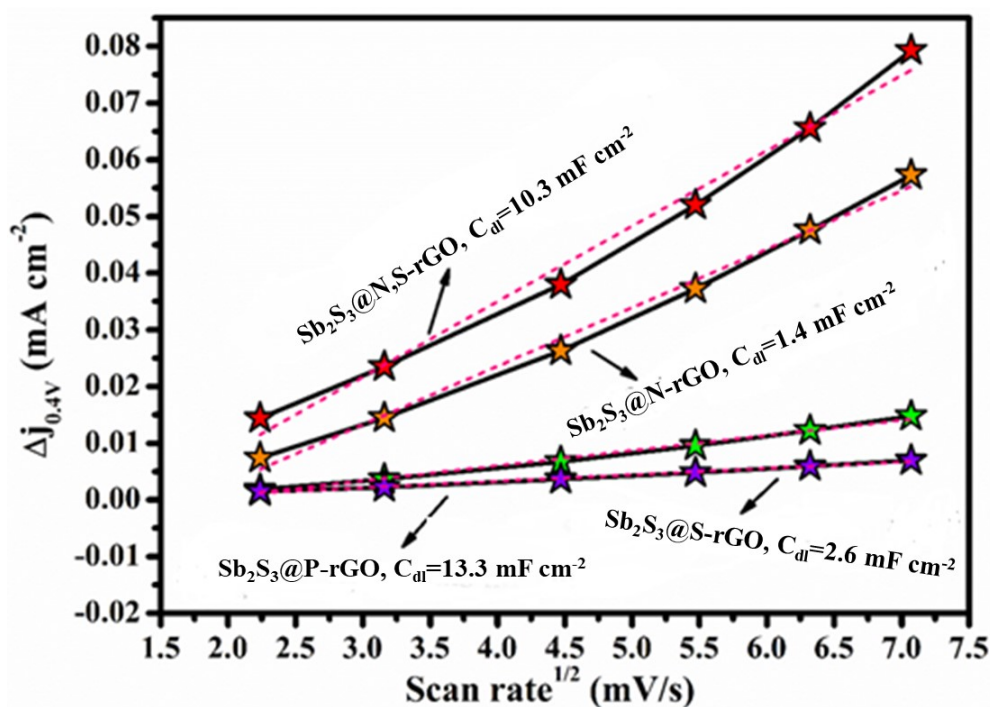

**Fig. S4.** ECSA measurements of Sb<sub>2</sub>S<sub>3</sub>@N-rGO, Sb<sub>2</sub>S<sub>3</sub>@S-rGO, Sb<sub>2</sub>S<sub>3</sub>@N,S-rGO and Sb<sub>2</sub>S<sub>3</sub>@P-rGO electrocatalysts. Plot between current density vs. square route of scan rates for measuring double layer capacitance (C<sub>dl</sub>).

## References

- 1 H. Li, L. Chen, P. Jin, Y. Li, J. Pang, J. Hou, S. Peng, G. Wang and Y. Shi, *Nano Res.*, 2022, **15**, 950–958.
- 2 T. Dong, X. Zhang, P. Wang, H. S. Chen and P. Yang, *Carbon N. Y.*, 2019, **149**, 222–233.
- 3 X. Guo, X. Duan, J. Ji, X. Fan, Y. Li, F. Zhang, G. Zhang, Y. A. Zhu, W. Peng and S. Wang, *J. Colloid Interface Sci.*, 2021, **583**, 139–148.
- 4 U. P. Suryawanshi, U. V. Ghorpade, D. M. Lee, M. He, S. W. Shin, P. V. Kumar, J. S. Jang, H. R. Jung, M. P. Suryawanshi and J. H. Kim, *Chem. Mater.*, 2021, **33**, 234–245.
- 5 L. Jiao, Y. X. Zhou and H. L. Jiang, *Chem. Sci.*, 2016, **7**, 1690–1695.
- 6 S. F. Zai, Y. T. Zhou, C. C. Yang and Q. Jiang, *Chem. Eng. J.*, 2021, **421**, 127856.
- 7 M. Arif, G. Yasin, M. Shakeel, M. A. Mushtaq, W. Ye, X. Fang, S. Ji and D. Yan, *J. Energy Chem.*, 2021, **58**, 237–246.
- 8 W. Yao, X. Jiang, Y. Li, C. Zhao, L. Ding, D. Sun and Y. Tang, *Green Energy Environ.*, 2021, 1–8.
- 9 X. Zhao, Y. Fan, H. Wang, C. Gao, Z. Liu, B. Li, Z. Peng, J. H. Yang and B. Liu, *ACS Omega*, 2020, **5**, 6516–6522.
- 10 W. K. Jo, S. Moru and S. Tonda, *ACS Sustain. Chem. Eng.*, 2019, **7**, 15373–15384.
- 11 K. Chhetri, A. Muthurasu, B. Dahal, T. Kim, T. Mukhiya, S. H. Chae, T. H. Ko, Y. C. Choi and H. Y. Kim, *Mater. Today Nano*, 2022, **17**, 100146.
- 12 J. Li, X. Zhang, Z. Zhang, Z. Li, M. Gao, H. Wei and H. Chu, *Electrochim. Acta*, 2019, **304**, 487–494.
- 13 C. Kim, S. Lee, S. H. Kim, I. Kwon, J. Park, S. Kim, J. H. Lee, Y. S. Park and Y. Kim, *Nanoscale Adv.*, 2021, **3**, 6386–6394.
- 14 A. Talha, A. Ahmed, J. Han, G. Shin, S. Park, S. Yeon, Y. Park, H. Kim and H. Im, 2023, **2023**, 14.
- 15 A. Muthurasu, G. P. Ojha, M. Lee and H. Y. Kim, *Electrochim. Acta*, 2020, **334**, 135537.
